# Supplementary material for: De Novo Transcriptome Assembly of Two Microsorum Fern Species Identifies Enzymes Required for Two Upstream Pathways of Phytoecdysteroids
Source: MDPI journal article supplement (doi:10.3390/ijms22042085), 2021-02-19

Supplementary

# ***De Novo* Transcriptome Assembly of Two *Microsorium* Fern Species Identifies Enzymes Required for Two Upstream Pathways of Phytoecdysteroids**

Siriporn Sripinyowanich <sup>1</sup>, Eui-Joon Kil <sup>2</sup>, Sahanat Petchsri <sup>1</sup>, Yeonhwa Jo <sup>3</sup>, Hoseong Choi <sup>3</sup>, Won Kyong Cho <sup>3,\*†</sup> and Sukchan Lee <sup>4,\*†</sup>

<sup>1</sup> Department of Botany, Faculty of Liberal Arts and Science, Kasetsart University, KamphaengSaen Campus, NakhonPathom 73140, Thailand; siriporn.srip@ku.th (S.S.); faassnps@ku.ac.th (S.P.)

<sup>2</sup> Department of Plant Medicals, Andong National University, Andong 36729, Korea; [viruskil@anu.ac.kr](mailto:viruskil@anu.ac.kr)

<sup>3</sup> Research Institute of Agriculture and Life Sciences, College of Agriculture and Life Sciences, Seoul National University, Seoul 08826, Korea; yeonhwajo@gmail.com (Y.J.); bioplanths@snu.ac.kr (H.C.); [wonkyong@gmail.com](mailto:wonkyong@gmail.com) (W.K.C.)

<sup>4</sup> Department of Integrative Biotechnology, Sungkyunkwan University, Suwon 16419, Korea; cell4u@skku.edu (S.L.)

\* Correspondence: [wonkyong@gmail.com](mailto:wonkyong@gmail.com) (W.K.C.); [cell4u@skku.edu](mailto:cell4u@skku.edu) (S.L.)

† These authors contributed equally to this work.

## **Supplementary data**

## **Supplementary Tables**

Table S1. Results of differential gene expression analysis using DESeq2 program.

Table S2. The list of differentially expressed transcription factor genes between MP and MS.

Table S3. Protein sequences involved in PEs biosynthesis identified from two *Microsorium* transcriptomes.

Table S4. Transcript abundance for identified transcripts in MP.

Table S5. Transcript abundance for identified transcripts in MS.

Table S6. Primer sequences used for real time RT-PCR.

Table S7. The information of 31 drosophila CYP proteins.

Table S8. Protein sequences of identified CYP proteins from MP.

Table S9. Protein sequences of identified CYP proteins from MS.

## Supplementary Figures

Figure S1. Experimental scheme for construction of two *Microsorium* reference transcriptomes. (a) Fronds from two different *Microsorium* species, *M. punctatum* (MP) and *M. scolopendria* (MS) were used for the preparation of the mRNA library. (b) HPLC analysis was conducted to measure phytoecdysteroids (PEs). (c) Paired-end sequenced reads by NovaSeq 6000 system were subjected to de novo transcriptome assembly followed by the deletion of contaminated sequences. (d) Clean transcripts associated with *Microsorium* were used for functional annotation. (e) Based on functional annotation and BLAST search, we identified putative enzymes in two *Microsorium* species involved in PEs biosynthesis.

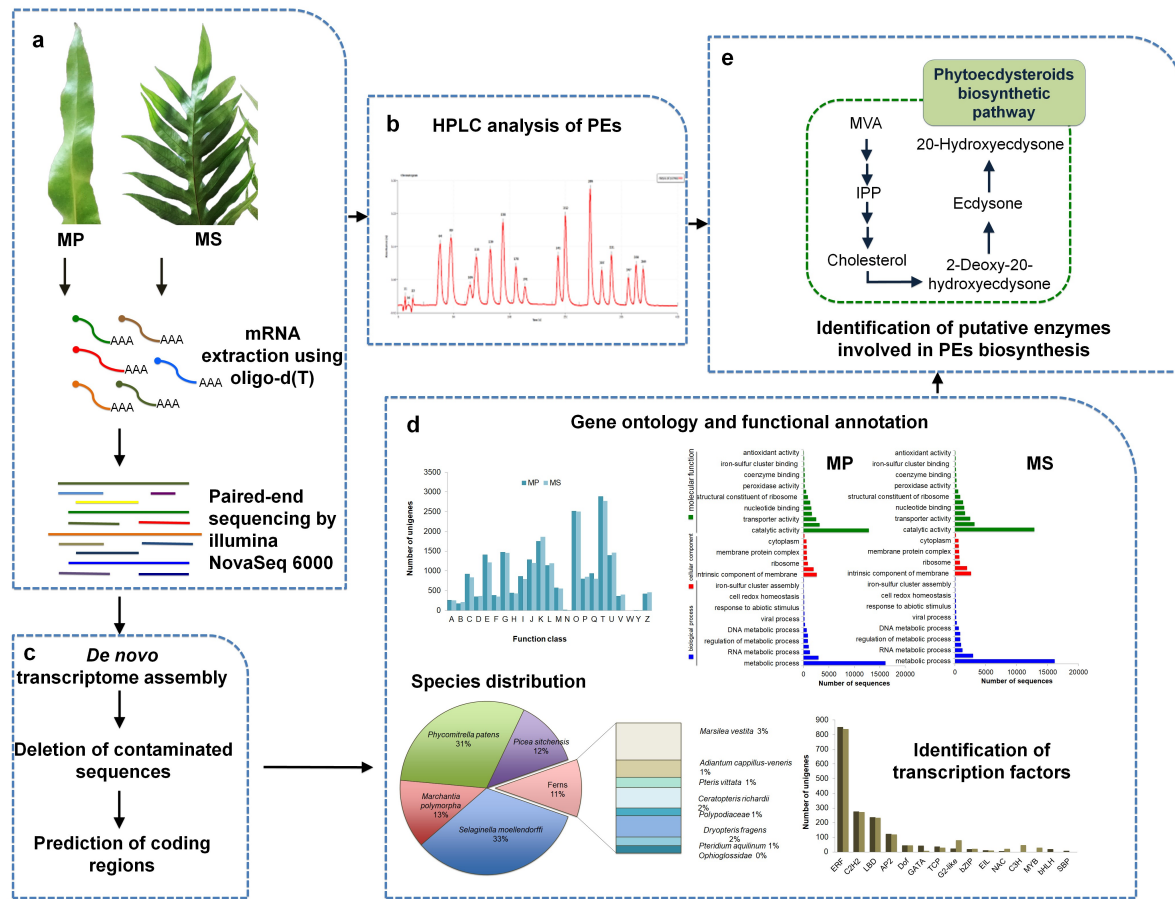

Figure S2. The relative expression levels of 11 transcripts encoding HMGS1, MVK, PMK, CAS, DHCR7, EBP, ERG-1, ERG-2, IDI, MVD, and SQS were measured by real-time RT-PCR. Red and blue bars indicate MP and MS, respectively. For the comparisons between MP and MS, we used independent T-tests. Asterisks represent significant differences (\*  $p < 0.05$ , \*\*  $p < 0.01$ , and \*\*\*  $p < 0.001$ ).

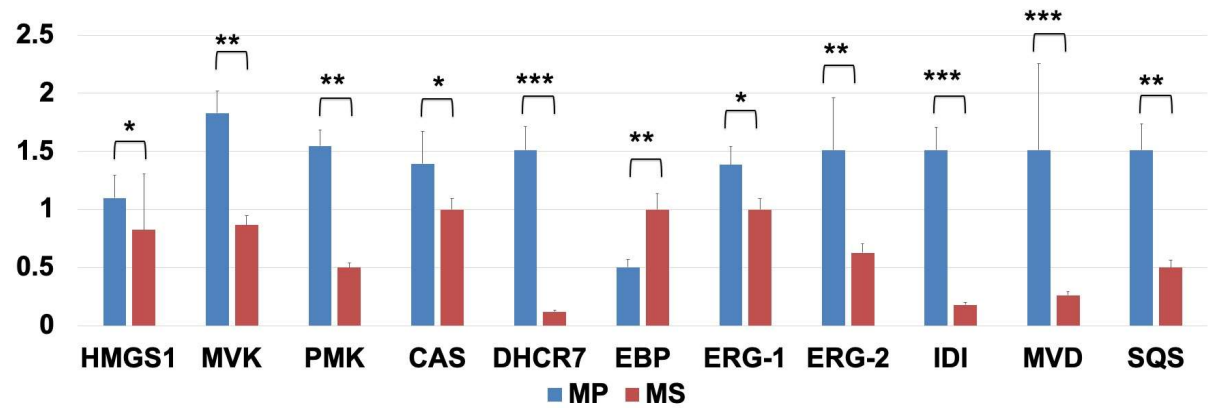

Figure S3. Phylogenetic tree of 146 CYP proteins identified from MP with the 31 drosophila CYP proteins. Protein sequences were aligned using MAFFT. The phylogenetic tree was generated by IQ-TREE using maximum likelihood method, LG+I+G4 substitution model, and bootstrap with 1,000 iterations. The phylogenetic tree was visualized by the FigTree (version 1.4.4) program.



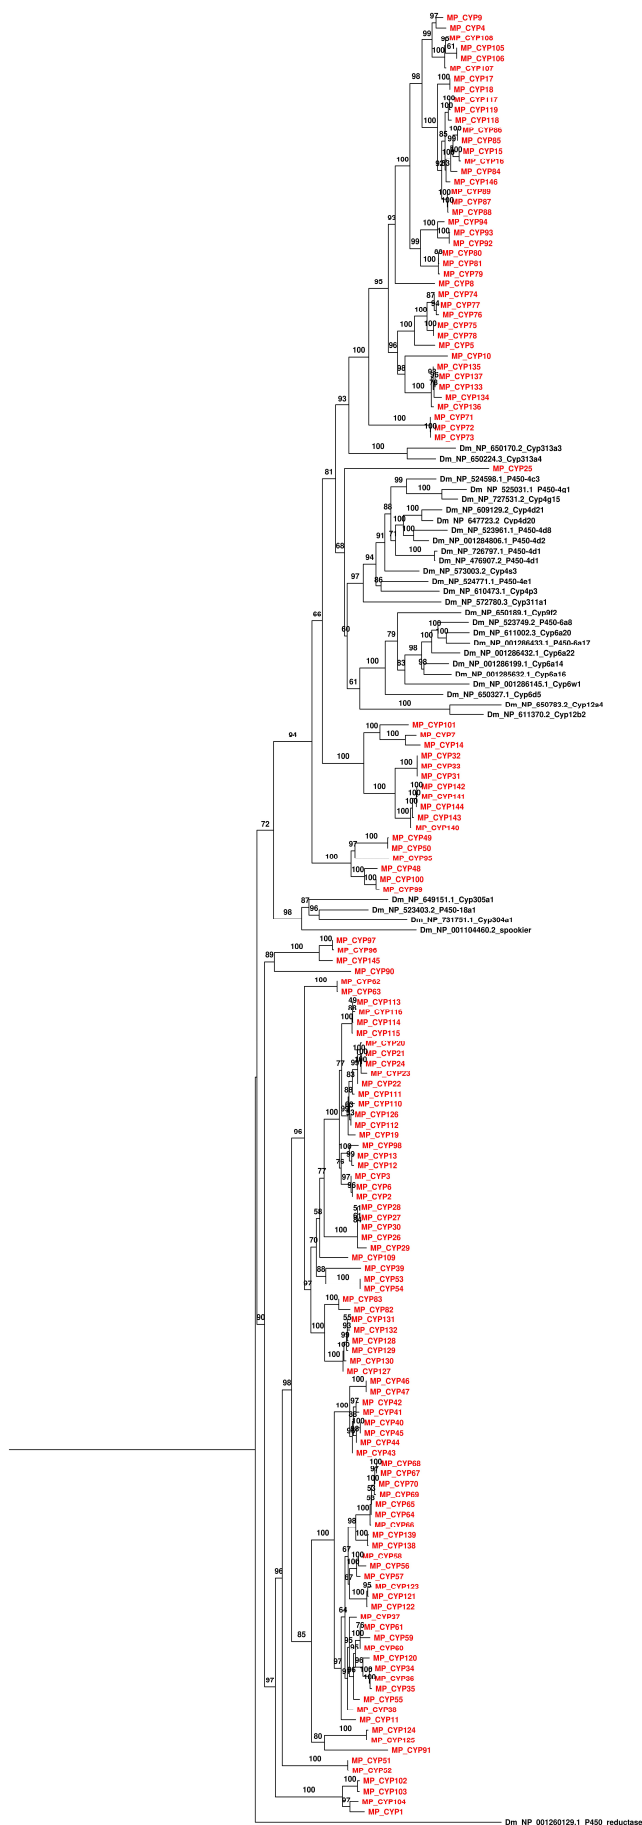

Figure S4. Phylogenetic tree of 141 CYP proteins identified from MS with the 31 drosophila CYP proteins. Protein sequences were aligned using MAFFT. The phylogenetic tree was generated by IQ-TREE using maximum likelihood method, LG+I+G4 substitution model, and bootstrap with 1,000 iterations. The phylogenetic tree was visualized by the FigTree (version 1.4.4) program.

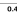

Figure S5. Phylogenetic tree of 146 and 141 CYP proteins identified from MP and MS, respectively, with the 31 drosophila CYP proteins. Protein sequences were aligned using MAFFT. The phylogenetic tree was generated by IQ-TREE using maximum likelihood method, LG+I+G4 substitution model, and bootstrap with 1,000 iterations. The phylogenetic tree was visualized by the FigTree (version 1.4.4) progra

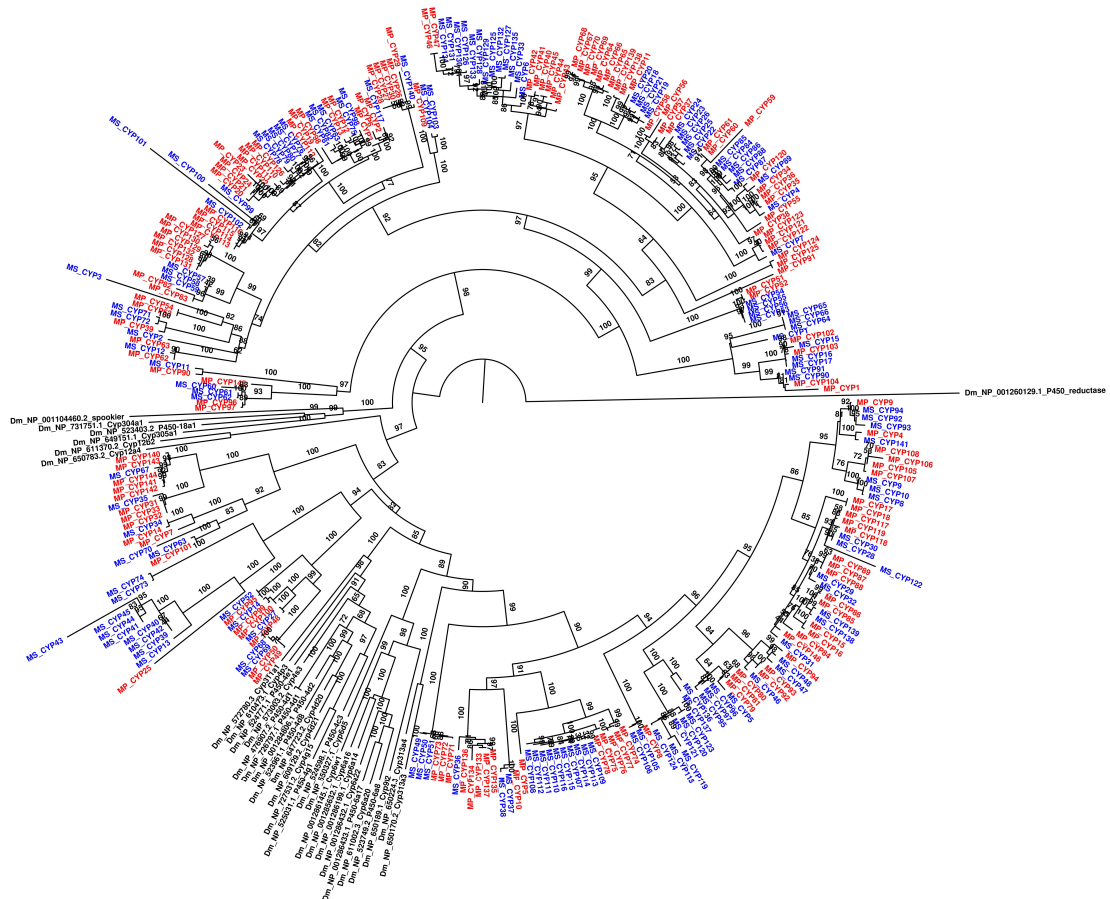

Supplement: s1 [file s1]
